# Supplementary material for: Global, regional, and national burden of leukemia, 1990–2021: a systematic analysis of the global burden of disease in 2021
Source: Front Med (Lausanne). 2025 Apr 15;12:1542317. doi: 10.3389/fmed.2025.1542317 (PMC12037485; doi:10.3389/fmed.2025.1542317)
Supplement: Supplementary file 2 [file Table_2.xlsx]

## Sheet: AgeDeviations
Age	Deviation	CI Lo	CI Hi
7.5	1.2062	0.69	1.7223
12.5	0.7482	0.2341	1.2622
17.5	0.4407	-0.0694	0.9508
22.5	0.0614	-0.4717	0.5945
27.5	-0.2875	-0.8399	0.265
32.5	-0.5079	-1.0511	0.0353
37.5	-0.6007	-1.1056	-0.0959
42.5	-0.6783	-1.1452	-0.2113
47.5	-0.7485	-1.177	-0.3201
52.5	-0.7004	-1.0709	-0.3299
57.5	-0.5711	-0.8773	-0.2649
62.5	-0.4438	-0.6939	-0.1938
67.5	-0.2594	-0.4638	-0.0551
72.5	-0.012	-0.1878	0.1637
77.5	0.2808	0.1097	0.4519
82.5	0.7077	0.5191	0.8962
87.5	1.3647	1.1413	1.5881

## Sheet: PerDeviations
Period	Deviation	CI Lo	CI Hi
1992.5	-0.0632	-0.1773	0.0509
1997.5	0.0098	-0.1133	0.1329
2002.5	0.0377	-0.0959	0.1713
2007.5	0.0495	-0.0884	0.1873
2012.5	0.0198	-0.1162	0.1558
2017.5	-0.0083	-0.1359	0.1193
2022.5	-0.0452	-0.1608	0.0705

## Sheet: CohDeviations
Cohort	Deviation	CI Lo	CI Hi
1905	0.1291	-0.3151	0.5733
1910	0.0724	-0.2711	0.4159
1915	0.0708	-0.2117	0.3533
1920	0.1057	-0.1321	0.3435
1925	0.0479	-0.1542	0.25
1930	0.0045	-0.1726	0.1816
1935	0.0041	-0.1597	0.1678
1940	0.0166	-0.1769	0.2101
1945	0.0698	-0.1666	0.3063
1950	0.0115	-0.2765	0.2994
1955	-0.0802	-0.4243	0.264
1960	-0.0959	-0.4988	0.3069
1965	-0.1314	-0.588	0.3252
1970	-0.1367	-0.6306	0.3572
1975	-0.0857	-0.6	0.4286
1980	-0.0214	-0.5435	0.5007
1985	0.0029	-0.5087	0.5144
1990	0.0141	-0.5451	0.5733
1995	0.0643	-0.5648	0.6934
2000	0.1245	-0.5997	0.8488
2005	0.1767	-0.6851	1.0385
2010	0.1874	-0.9146	1.2894
2015	0.1399	-1.5194	1.7992

## Sheet: LongAge
Age	Rate	CILo	CIHi
7.5	0.001	0.0004	0.0024
12.5	0.0008	0.0003	0.0019
17.5	0.0007	0.0003	0.0017
22.5	0.0006	0.0003	0.0014
27.5	0.0006	0.0003	0.0012
32.5	0.0006	0.0003	0.0012
37.5	0.0007	0.0004	0.0012
42.5	0.0008	0.0004	0.0014
47.5	0.0009	0.0005	0.0016
52.5	0.0012	0.0007	0.002
57.5	0.0018	0.0011	0.0028
62.5	0.0025	0.0016	0.004
67.5	0.0039	0.0024	0.0062
72.5	0.0063	0.004	0.0101
77.5	0.0108	0.0068	0.0171
82.5	0.021	0.0132	0.0334
87.5	0.0514	0.0323	0.0818

## Sheet: CrossAge
Age	Rate	CILo	CIHi
7.5	0.0003	0.0002	0.0006
12.5	0.0003	0.0002	0.0005
17.5	0.0003	0.0002	0.0006
22.5	0.0003	0.0002	0.0006
27.5	0.0003	0.0002	0.0006
32.5	0.0004	0.0002	0.0007
37.5	0.0006	0.0003	0.001
42.5	0.0008	0.0005	0.0013
47.5	0.0011	0.0007	0.0017
52.5	0.0016	0.0011	0.0025
57.5	0.0028	0.002	0.0039
62.5	0.0047	0.0035	0.0063
67.5	0.0083	0.0064	0.0108
72.5	0.0158	0.0125	0.02
77.5	0.0314	0.0251	0.0393
82.5	0.0713	0.0568	0.0895
87.5	0.2039	0.1593	0.2608

## Sheet: Long2CrossRR
Age	Rate Ratio	CILo	CIHi
7.5	2.9659	1.4926	5.8934
12.5	2.5424	1.334	4.8454
17.5	2.1794	1.1903	3.9902
22.5	1.8682	1.06	3.2924
27.5	1.6014	0.9417	2.7232
32.5	1.3728	0.8342	2.2589
37.5	1.1767	0.7364	1.8805
42.5	1.0087	0.6472	1.572
47.5	0.8647	0.5661	1.3207
52.5	0.7412	0.4923	1.116
57.5	0.6354	0.4254	0.9489
62.5	0.5446	0.3652	0.8123
67.5	0.4669	0.3113	0.7001
72.5	0.4002	0.2637	0.6074
77.5	0.3431	0.222	0.53
82.5	0.2941	0.186	0.465
87.5	0.2521	0.1551	0.4098

## Sheet: FittedTemporalTrends
Period	Rate	CILo	CIHi
1992.5	0.0015	0.001	0.0024
1997.5	0.0014	0.0009	0.0022
2002.5	0.0012	0.0008	0.0019
2007.5	0.0011	0.0007	0.0017
2012.5	0.0009	0.0005	0.0014
2017.5	0.0007	0.0004	0.0012
2022.5	0.0006	0.0004	0.001

## Sheet: PeriodRR
Period	Rate Ratio	CILo	CIHi
1992.5	1.4184	1.0946	1.838
1997.5	1.308	1.041	1.6434
2002.5	1.1529	0.9351	1.4215
2007.5	1	1	1
2012.5	0.8321	0.6735	1.028
2017.5	0.6935	0.5518	0.8718
2022.5	0.573	0.4464	0.7355

## Sheet: CohortRR
Cohort	Rate Ratio	CILo	CIHi
1905	6.8197	3.935	11.8192
1910	5.5239	3.3391	9.1383
1915	4.7275	2.8996	7.7077
1920	4.1965	2.5891	6.802
1925	3.3951	2.1053	5.4751
1930	2.7869	1.7414	4.46
1935	2.3878	1.5048	3.789
1940	2.0726	1.3046	3.2927
1945	1.8738	1.1752	2.9878
1950	1.5152	0.9425	2.4359
1955	1.1851	0.7254	1.9363
1960	1	1	1
1965	0.8274	0.4657	1.4698
1970	0.7055	0.3738	1.3316
1975	0.6364	0.3162	1.2807
1980	0.5817	0.2719	1.2447
1985	0.5109	0.2262	1.1541
1990	0.4429	0.1837	1.0678
1995	0.3992	0.1531	1.0413
2000	0.3635	0.127	1.0403
2005	0.3282	0.1011	1.0656
2010	0.2844	0.0709	1.14
2015	0.2325	0.0354	1.5279

## Sheet: LocalDrifts
Age	Percent per Year	CILo	CIHi
7.5	-2.43	-6.6914	2.0261
12.5	-2.2804	-5.5682	1.1218
17.5	-2.2414	-5.1841	0.7926
22.5	-2.2562	-5.0596	0.6299
27.5	-2.3552	-5.0653	0.4323
32.5	-2.5386	-5.1237	0.1168
37.5	-2.7265	-5.1369	-0.2548
42.5	-3.1386	-5.343	-0.8828
47.5	-3.5967	-5.5636	-1.5887
52.5	-3.7038	-5.4242	-1.952
57.5	-3.5742	-5.0509	-2.0745
62.5	-3.3629	-4.6201	-2.089
67.5	-3.2451	-4.3131	-2.1652
72.5	-3.1914	-4.1035	-2.2707
77.5	-3.1902	-3.9832	-2.3906
82.5	-3.3126	-4.0569	-2.5625
87.5	-3.4034	-4.2709	-2.528

[truncated: 3 more sheets: NetDrift, Waldtests, Coefficients]
